# Supplementary material for: Prokaryotic diversity and biogeochemical characteristics of benthic microbial ecosystems at La Brava, a hypersaline lake at Salar de Atacama, Chile
Source: PLoS One. 2017 Nov 15;12(11):e0186867. doi: 10.1371/journal.pone.0186867 (PMC5687714; doi:10.1371/journal.pone.0186867)
Supplement: S1 File — (XLSX) [file pone.0186867.s005.xlsx]

## Sheet: Hoja1
		Poysulfides (µM)		Thiosulfate (µM)
La Brava		Average (n=3)	stand dev	Average (n=3)	stand dev
NLM	day	40.3	13.9	33.3	8.1
	night	190.3	31.2	112.3	23
PM	day	31	11.8	13.7	4.7
	night	130.7	33.3	39.7	19.8
BM	day	14	3.6	10.7	1.2
	night	n.a.	n.a.	n.a.	n.a.
Tebenquiche
MA1	day	62.3	24	62.3	24
	night	434.3	115	273	49.5
MA2	day	44	30	113	40.5
	night	n.a.	n.a.	n.a.	n.a.
